# Supplementary material
Source: bioRxiv or medRxiv preprint supplement (https://www.biorxiv.org/highwire/filestream/15548/field_highwire_adjunct_files/13/056614-8.pdf)

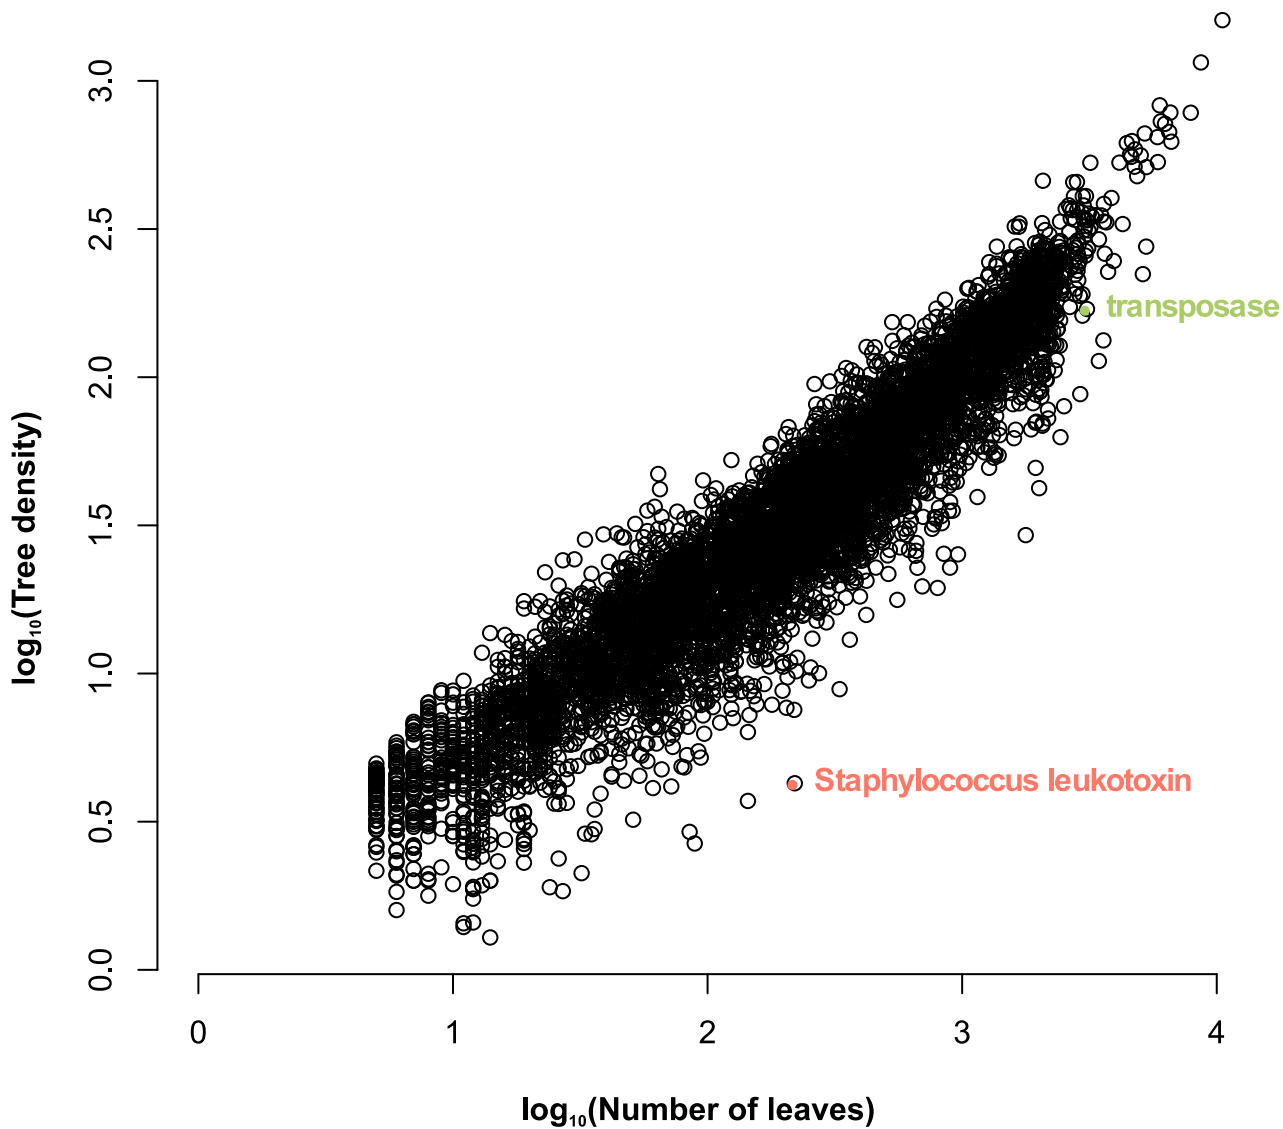

Supplement: Supplementary file [file 056614-8.pdf]
